# Supplementary material for: Lamin B1 protein is required for dendrite development in primary mouse cortical neurons
Source: PubMed Central journal article supplement — Mol Biol Cell. 2016 Jan 1;27(1):35–47. doi: 10.1091/mbc.E15-05-0307 (PMC4694760; doi:10.1091/mbc.e15-05-0307), 2016-01-01
Supplement: supp_E15-05-0307v1_CombinedSupMats.pdf [file supp_E15-05-0307v1_CombinedSupMats.pdf]

# Supplemental Materials

*Molecular Biology of the Cell*

Giacomini et al.

# **Lamin B1 protein is required for dendrite development in primary mouse cortical neurons**

Caterina Giacomini<sup>1</sup>, Sameehan Mahajani<sup>1</sup>, Roberta Ruffilli<sup>2</sup>, Roberto Marotta<sup>2</sup> and Laura Gasparini<sup>1</sup>

<sup>1</sup>*Molecular Neurodegeneration Lab, Neuroscience and Brain Technologies Department and*

<sup>2</sup>*Electron Microscopy Lab, Nanochemistry Department, Istituto Italiano di Tecnologia, Via Morego 30, Genova, Italy*

## **Supplementary Material:**

- Supplementary Figures 1- 6
- Supplementary movielegends

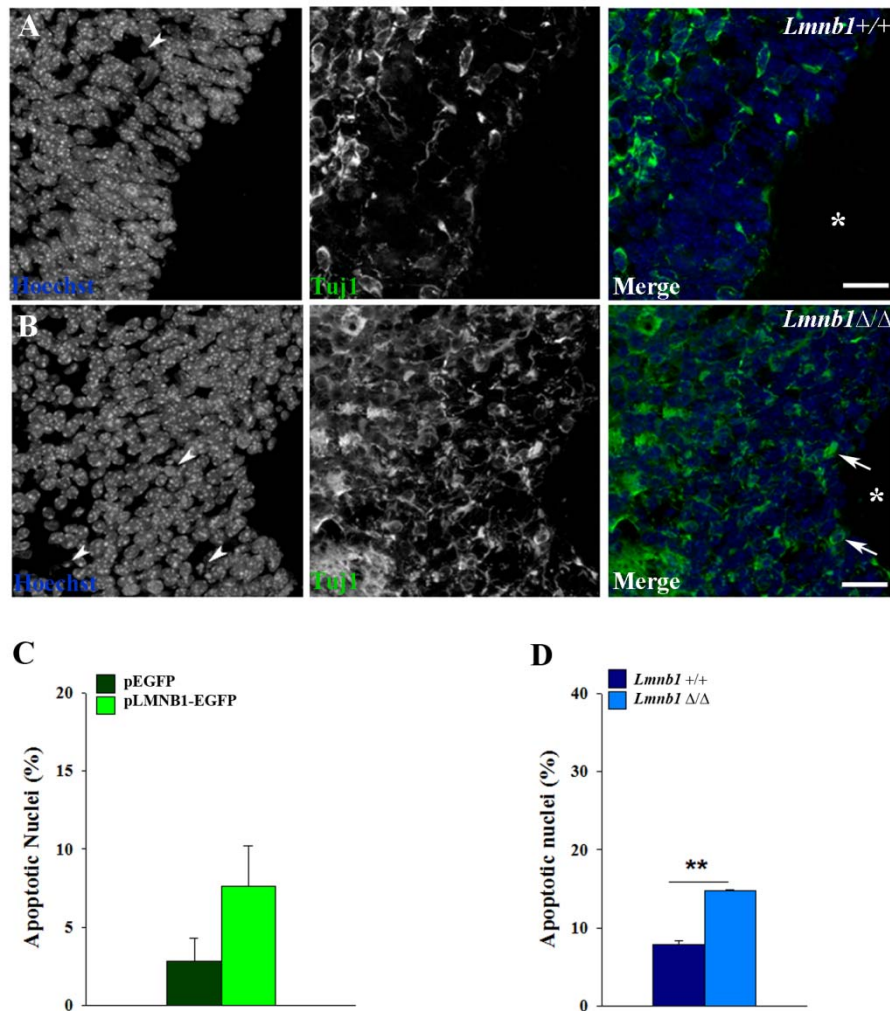

**Supplementary Figure 1 - *Lmnbl1* deficiency induces apoptosis in primary cortical neurons and embryonic brain.** **A-B.** Representative maximal projections of confocal z-stack images of βIII-tubulin (green; TuJ1 antibody) immunoreactivity in the SVZ of *Lmnbl1*<sup>+/+</sup> (A) and *Lmnbl1*<sup>Δ/Δ</sup> (B) E17.5 embryonic brain. Arrowheads indicate apoptotic nuclei. Arrows indicate βIII-tubulin positive cells in the SVZ. Asterisks indicate ventricles. In all images, nuclei are counterstained with Hoechst 33342 (blue). Scale bars: 20 μm. **C-D.** pLMNB1-EGFP, pEGFP transfected primary cortical neurons and *Lmnbl1*<sup>+/+</sup>, *Lmnbl1*<sup>Δ/Δ</sup> primary cortical neurons were

cultured for 7 days and nuclei analyzed as described in the Methods. Quantitative analysis of apoptotic nuclei in pLMNB1-EGFP, pEGFP transfected primary cortical neurons (C) and in *Lmnb1*<sup>+/+</sup>, *Lmnb1* $\Delta/\Delta$  primary cortical neurons (D). At least 100 neurons were counted for each experimental condition. Bars represent mean percentage  $\pm$  SEM of 4 independent experiments.

\* $p < 0.05$ ; Student t-test.

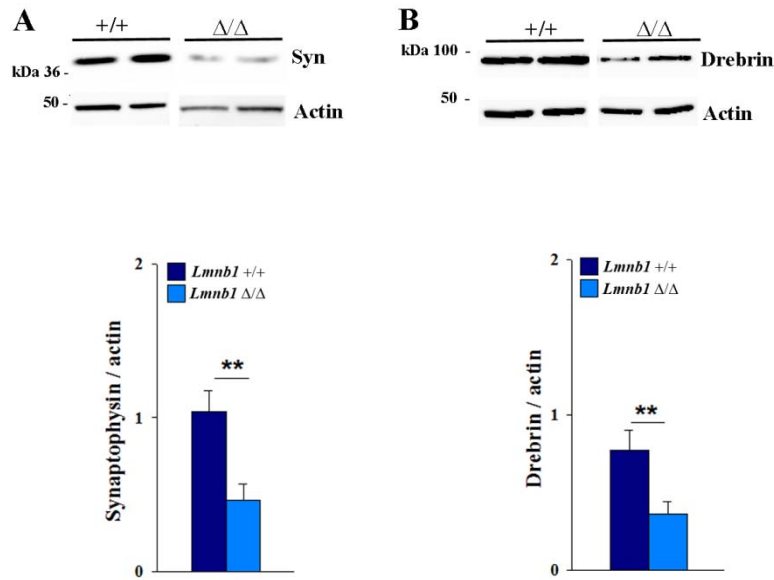

**Supplementary Figure 2-Lmnb1-null cortical neurons display reduced expression of synaptophysin and drebrin.** A-B. Representative Western blots and quantitative analysis of synaptophysin (A), drebrin (B) in lysates of *Lmnb1*<sup>+/+</sup> and *Lmnb1* $\Delta/\Delta$  mature primary cortical neurons (18 DIV). The data are normalized to actin. Bars represent the average ratio  $\pm$  SEM. *Lmnb1*<sup>+/+</sup>, n=7; *Lmnb1* $\Delta/\Delta$ , n=8 embryos. \*\*p< 0.01, Student t-test.

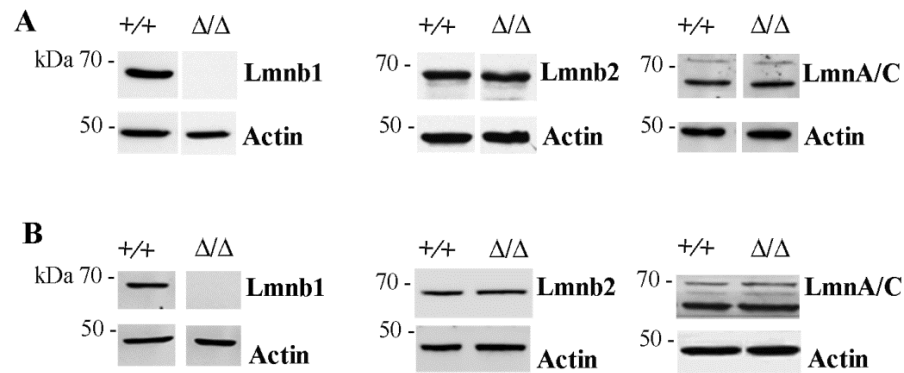

**Supplementary Figure 3 -Lmnb1 deficiency does not alter LmnA/C or Lmnb2 expression levels in cultured neurons and embryonic brain.A-B.** Representative Western blots of Lmnb1, Lmnb2, LmnA/C and actin in lysates from 7 DIV primary cortical neurons (A) and brain (B) from *Lmnb1*<sup>+/+</sup>(+/+) and *Lmnb1*<sup>Δ/Δ</sup>(Δ/Δ) E17.5 embryo.

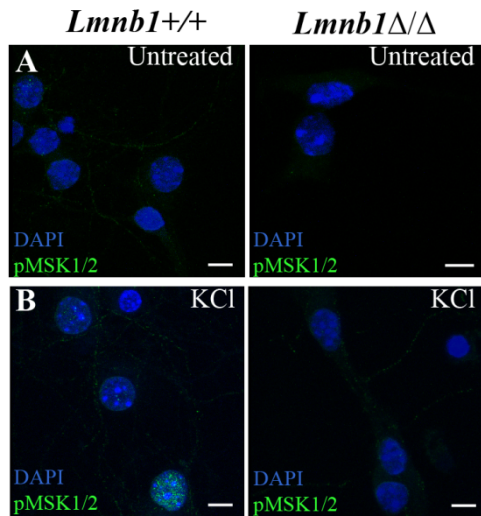

**Supplementary Figure 4- *Lmnb1* deficiency impairs pERK nuclear signaling in primary cortical neurons.** **A-B.** Representative maximal projections of confocal z-stack images of pMSK1/2 (green, A, B) immunoreactivity in 7DIV *Lmnb1*<sup>+/+</sup> and *Lmnb1*<sup>Δ/Δ</sup> primary cortical neurons incubated with 50 mM KCl for 1 h (B) or untreated (A). Nuclei are counterstained with DAPI. Scale bars: 5μm.

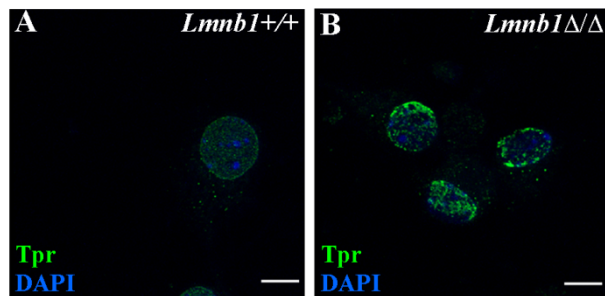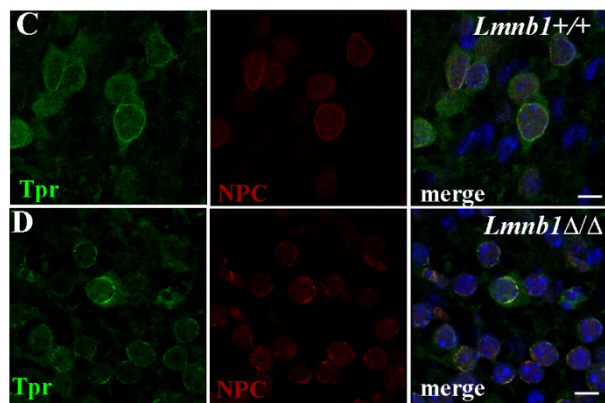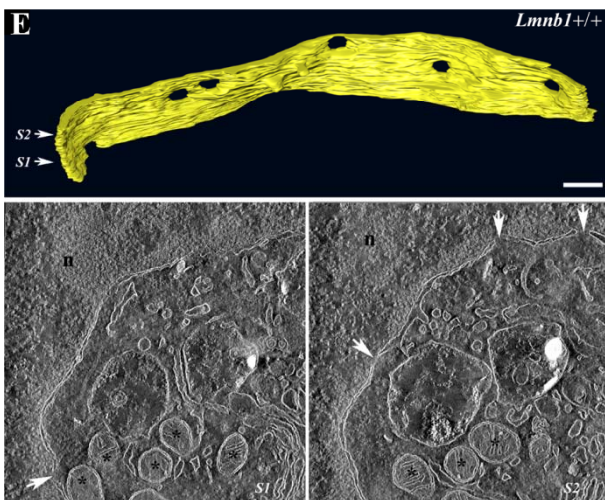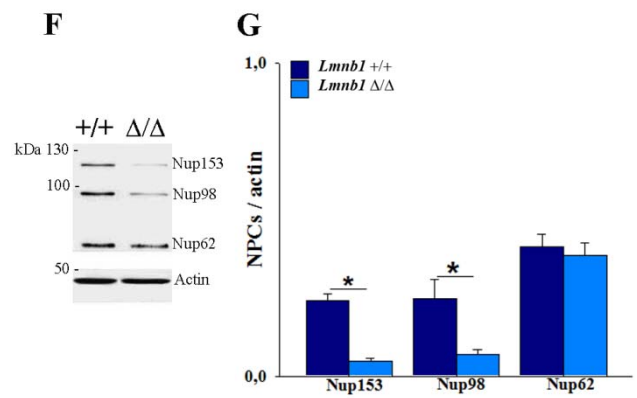

**Supplementary Figure 5 - Lmnb1 deficiency alters distribution and expression of nucleoporins.****A-B.** Representative maximal projections of confocal z-stack images of Tpr immunoreactivity (green) in *Lmnb1*<sup>+/+</sup>(A) and *Lmnb1* $\Delta/\Delta$ (B) primary cortical neurons (7 DIV). **C-D.** Representative maximal projections of confocal z-stack images of *Lmnb1*<sup>+/+</sup> and *Lmnb1* $\Delta/\Delta$  E17.5 embryonic cortex stained against Tpr (green) and NPCs (red). In panels A-D, nuclei are counterstained with DAPI; scale bars 5  $\mu$ m. **E.** Top panel: 3D model of a *Lmnb1*<sup>+/+</sup> nuclear membrane fragment representing the reconstruction of a 300 nm tomogram acquired in high angular annular dark field (HAADF) scanning TEM (STEM) (see Supplementary Movie 2). Scale bars: 200 nm. Lower panel: single tomogram slices corresponding to sections S1 and S2 in the 3D model. White arrows point to NPCs; asterisks point to mitochondria. Abbreviation: n, nucleus. **F.** Representative Western blot analysis of NPC expression levels in brain lysates from E17.5 *Lmnb1*<sup>+/+</sup> and *Lmnb1* $\Delta/\Delta$  embryos. **G.** Quantitative analysis of NPC expression levels in E17.5 *Lmnb1*<sup>+/+</sup> and *Lmnb1* $\Delta/\Delta$  brains. The data are normalized to actin. Bars represent the average ratio  $\pm$  SEM. n=3 per genotype. \*p< 0.05, Student t-test.

**A**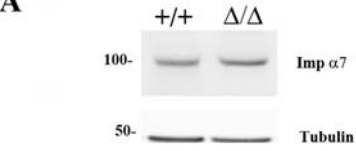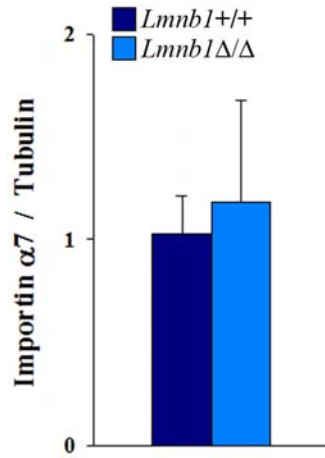**B**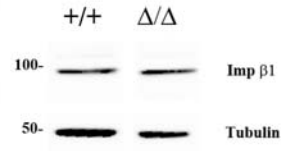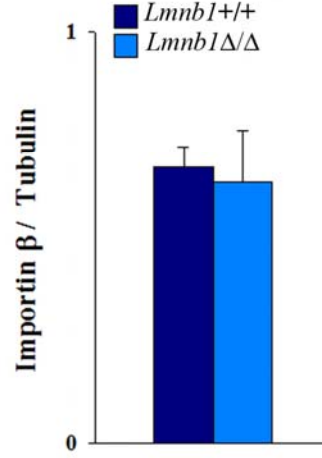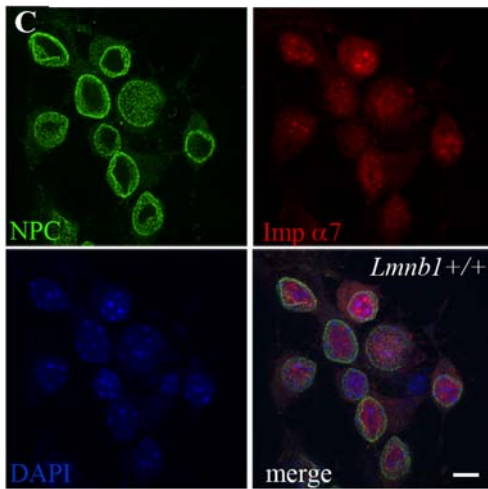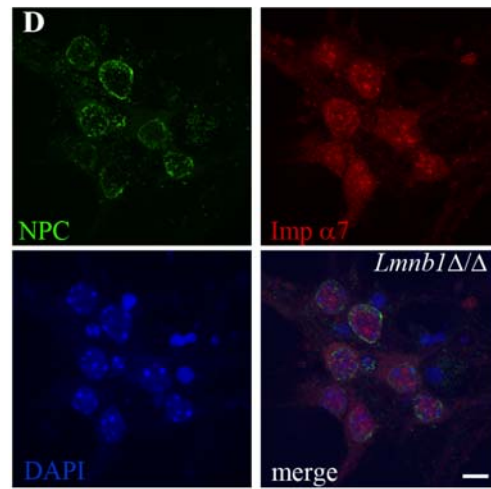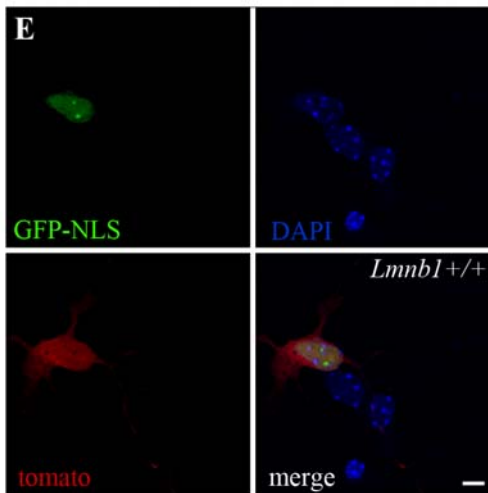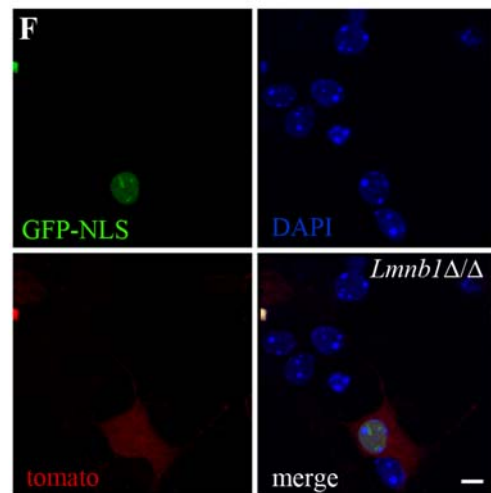

**Supplementary Figure 6– Importin $\alpha$ 7 and importin $\beta$ 1 expression and karyopherin-mediated nuclear import of GFP-NLSarenormal in *Lmnb1*-deficient neurons. A-B.** Quantitative analysis of Importin $\alpha$ 7 (Imp  $\alpha$ 7; A) and Importin $\beta$ 1 (Imp  $\beta$ 1; B) expression levels in 7DIV *Lmnb1*<sup>+/+</sup> and *Lmnb1* $\Delta/\Delta$  primary cortical neurons. Protein expression levels were analyzed by sWestern blot and normalized to tubulin. Bars represent the average ratio  $\pm$  SEM. n = 4 per genotype. **C-D** Representative maximal projections of z-stack confocal images of *Lmnb1*<sup>+/+</sup> (C) and *Lmnb1* $\Delta/\Delta$  (D) primary cortical neurons immunostained against NPC (green) and Importin $\alpha$ 7 (red). **E-F** GFP-NLS nuclear translocation. Representative maximal projections of z-stack confocal images of *Lmnb1*<sup>+/+</sup> (E) and *Lmnb1* $\Delta/\Delta$  (F) neurons transfected with pGFP-NLS-IRES-TOMATO. GFP-NLS (green) and Tomato (red) fluorescence are shown. Nuclei are counterstained with DAPI (blue). In C-F, Scale bars: 5  $\mu$ m.
